# Supplementary material
Source: PubMed Central journal article supplement (PMC11113494)
Supplement: 18_2012_1059_MOESM1_ESM.pdf [file 18_2012_1059_MOESM1_ESM.pdf]

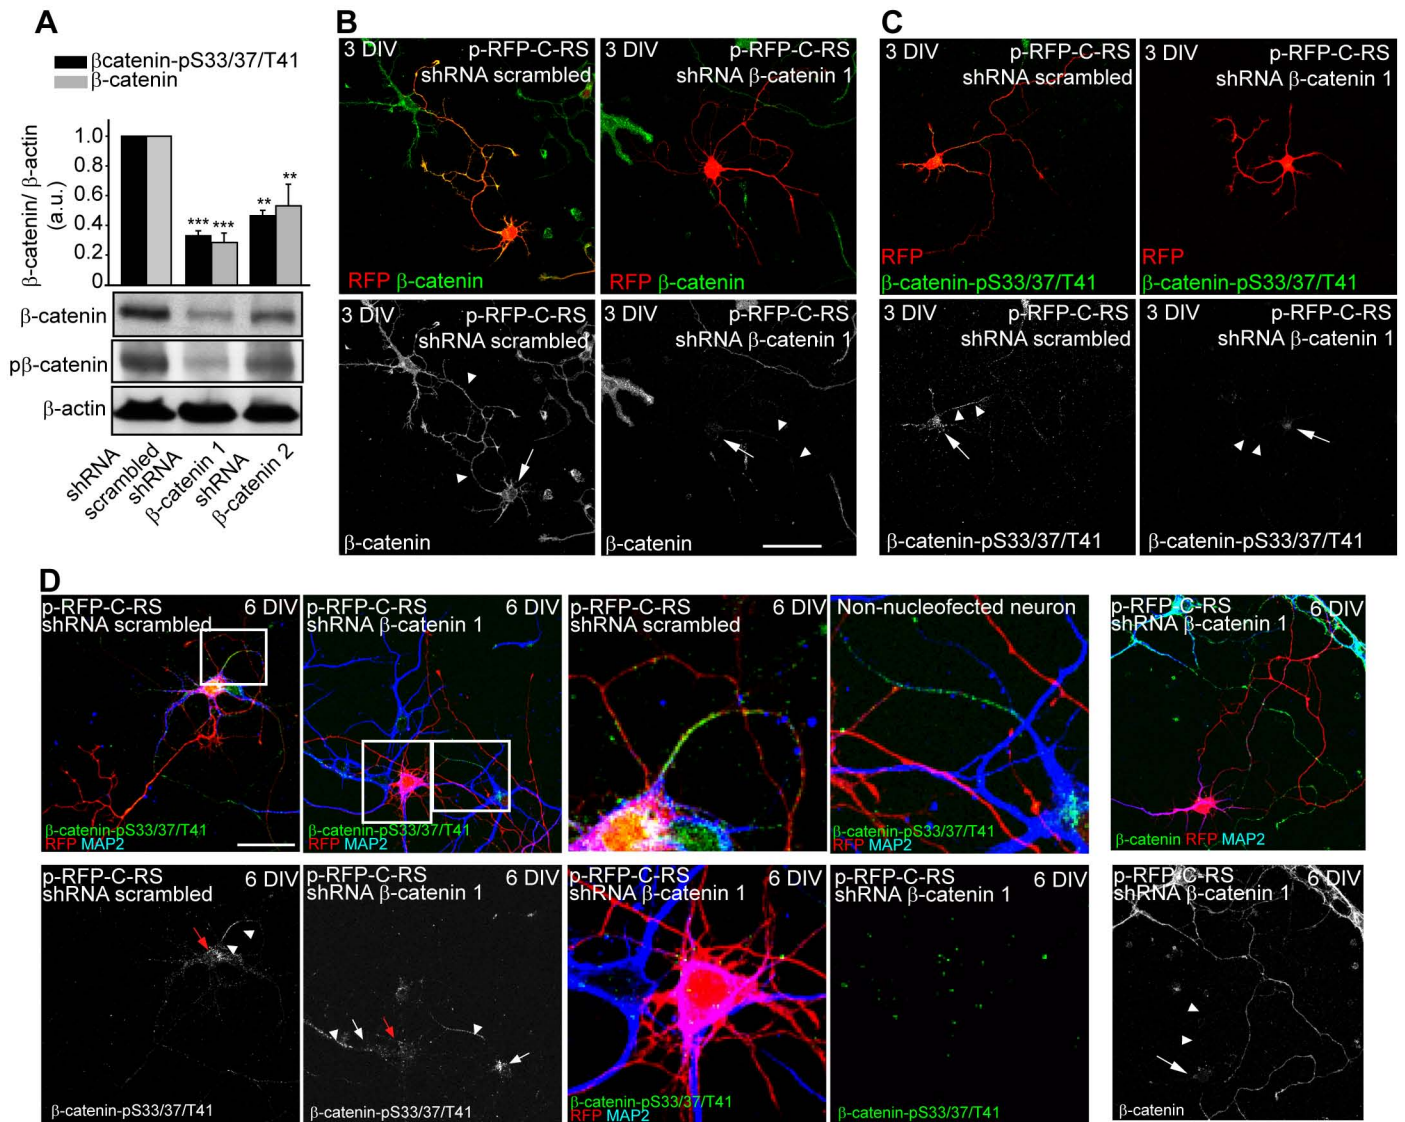

Supplementary figure 1  
CMLS-D-12-00047R1

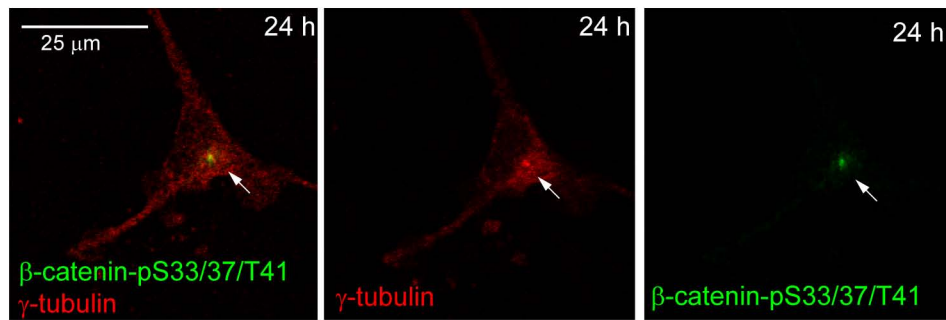

Supplementary figure 2  
CMLS-D-12-00047R1

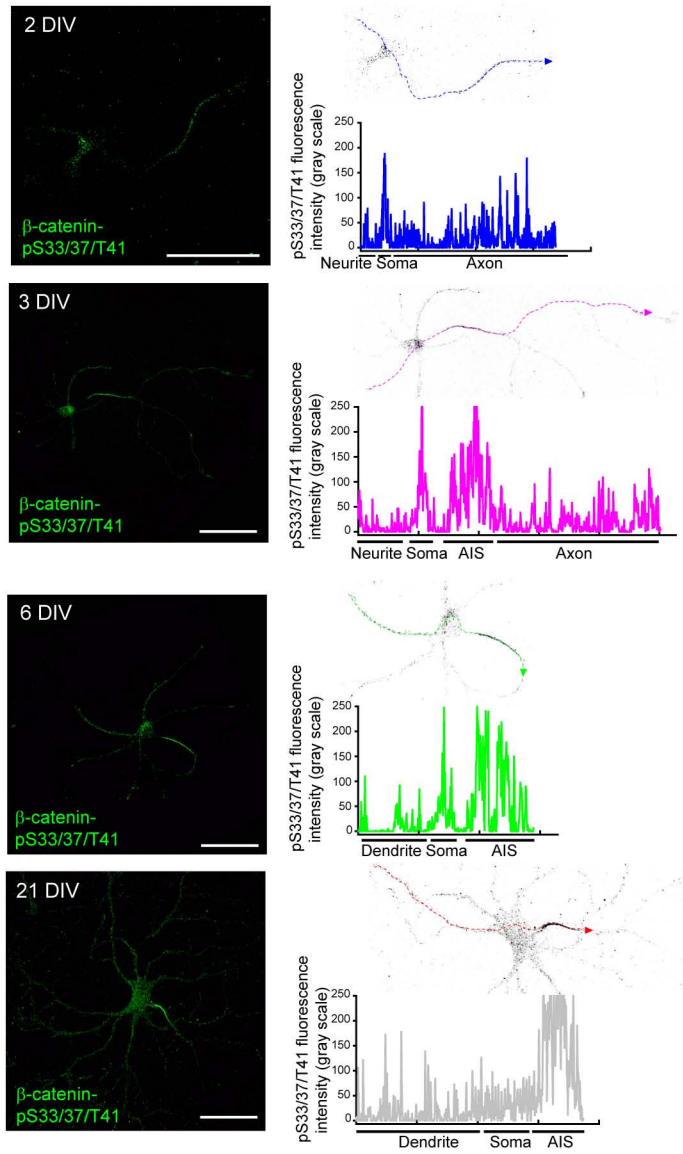

Supplementary figure 3  
 CMLS-D-12-00047R1

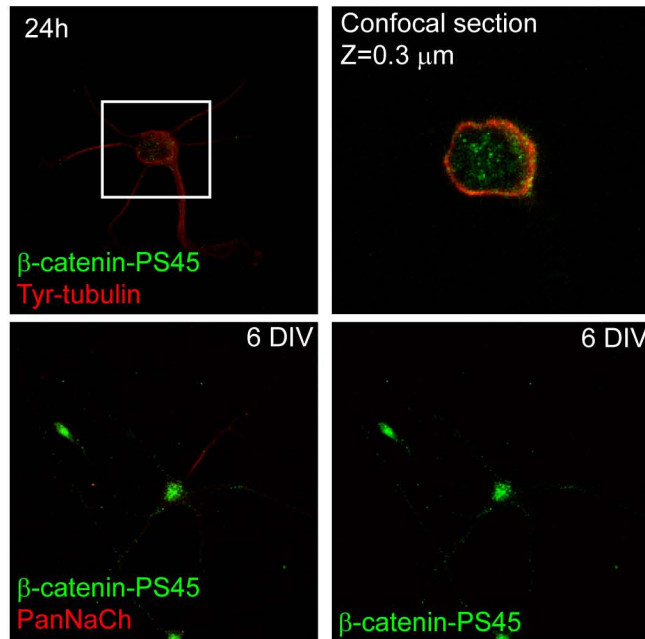

Supplementary figure 4  
CMLS-D-12-00047R1

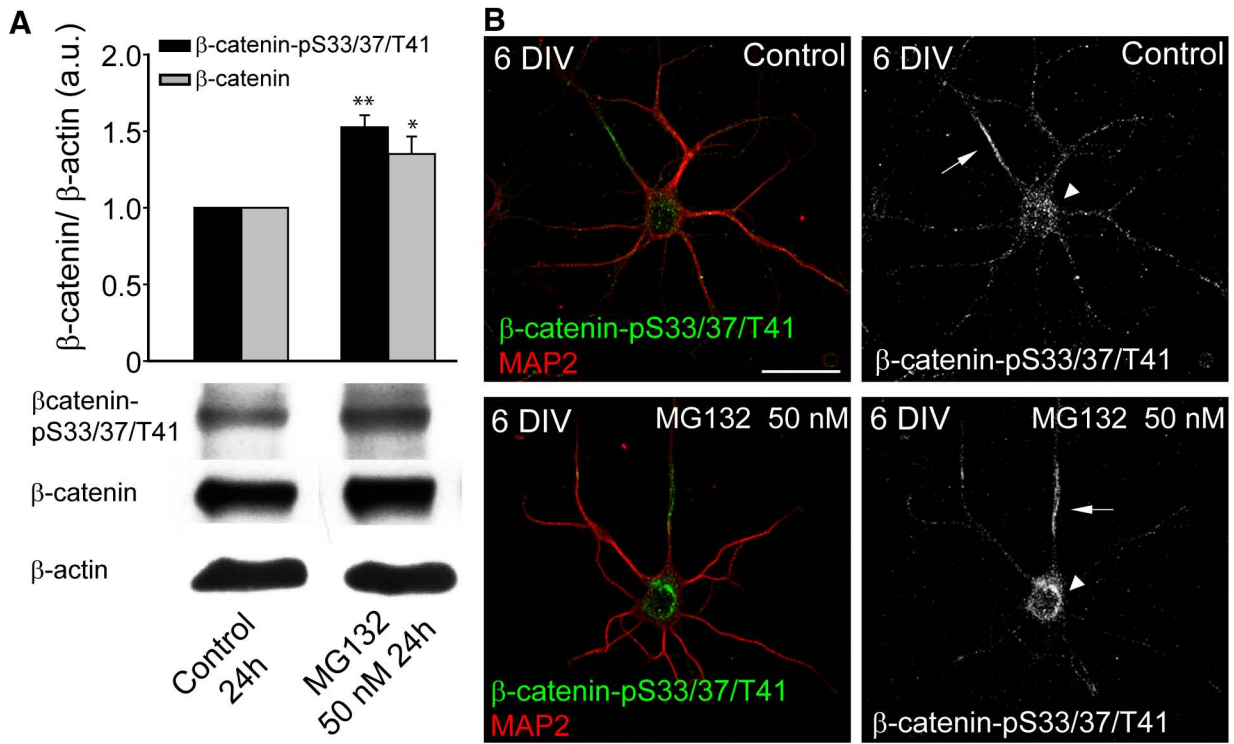

Supplementary figure 5  
CMLS-D-12-00047R1

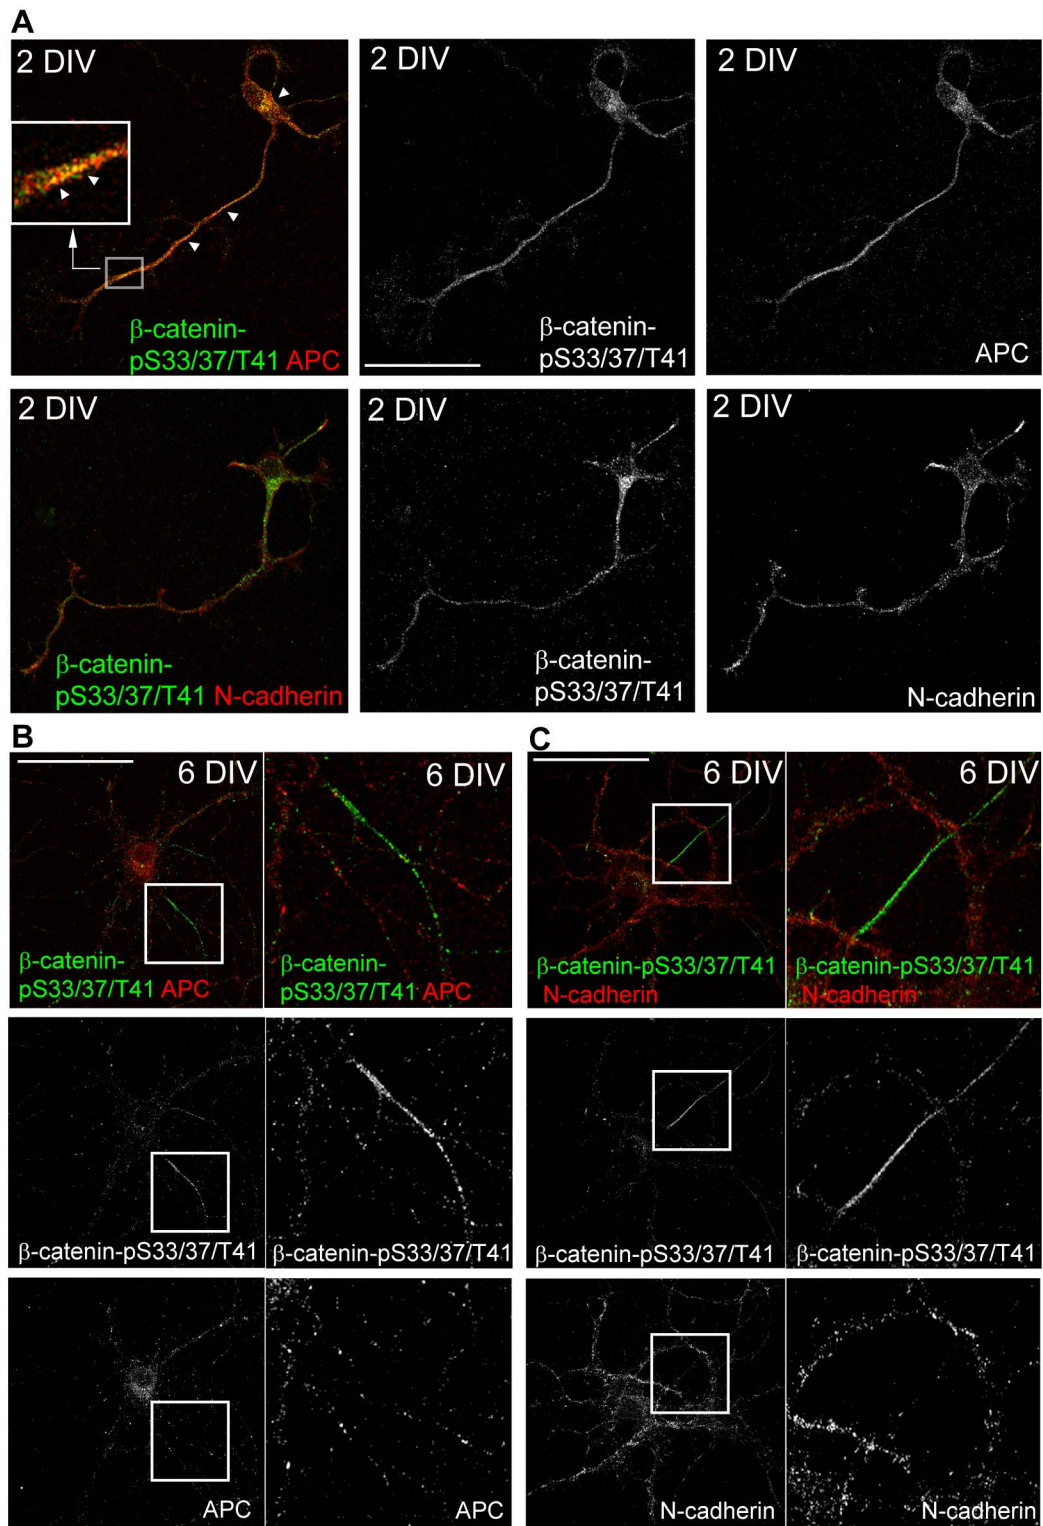

Supplementary figure 6  
CMLS-D-12-00047R1



| Fluoresc. Intensity |     | 6 DIV (% neurons) |        |         | 14 DIV (% neurons) |        |         |
|---------------------|-----|-------------------|--------|---------|--------------------|--------|---------|
|                     |     | High              | Weak   | Absence | High               | Weak   | Absence |
| p-β-catenin         | Sc  | 65 ± 4            | 15 ± 2 | 20 ± 3  | 82 ± 1             | 18 ± 1 | 0       |
|                     | Sh1 | 13 ± 3 ***        | 25 ± 3 | 62 ± 5  | 6 ± 1 ***          | 32 ± 2 | 62 ± 1  |
|                     | Sh2 | 35 ± 8 **         | 31 ± 5 | 34 ± 4  | 21 ± 1 ***         | 46 ± 2 | 33 ± 1  |
| AnkyrinG            | Sc  | 85 ± 2            | 13 ± 2 | 2 ± 1   | 91 ± 1             | 9 ± 1  | 0       |
|                     | Sh1 | 37 ± 5 ***        | 44 ± 8 | 19 ± 5  | 27 ± 1 ***         | 58 ± 2 | 15 ± 2  |
|                     | Sh2 | 68 ± 3 **         | 28 ± 1 | 4 ± 2   | 60 ± 4 ***         | 40 ± 4 | 0       |
| PanNaCh             | Sc  | 79 ± 3            | 14 ± 2 | 7 ± 2   | 86 ± 4             | 9 ± 1  | 5 ± 4   |
|                     | Sh1 | 29 ± 1 ***        | 48 ± 3 | 23 ± 3  | 19 ± 3 ***         | 58 ± 3 | 23 ± 1  |
|                     | Sh2 | 65 ± 4 *          | 28 ± 3 | 7 ± 2   | 53 ± 1 ***         | 43 ± 3 | 4 ± 2   |

Supplementary figure 7  
CMLS-D-12-00047R1

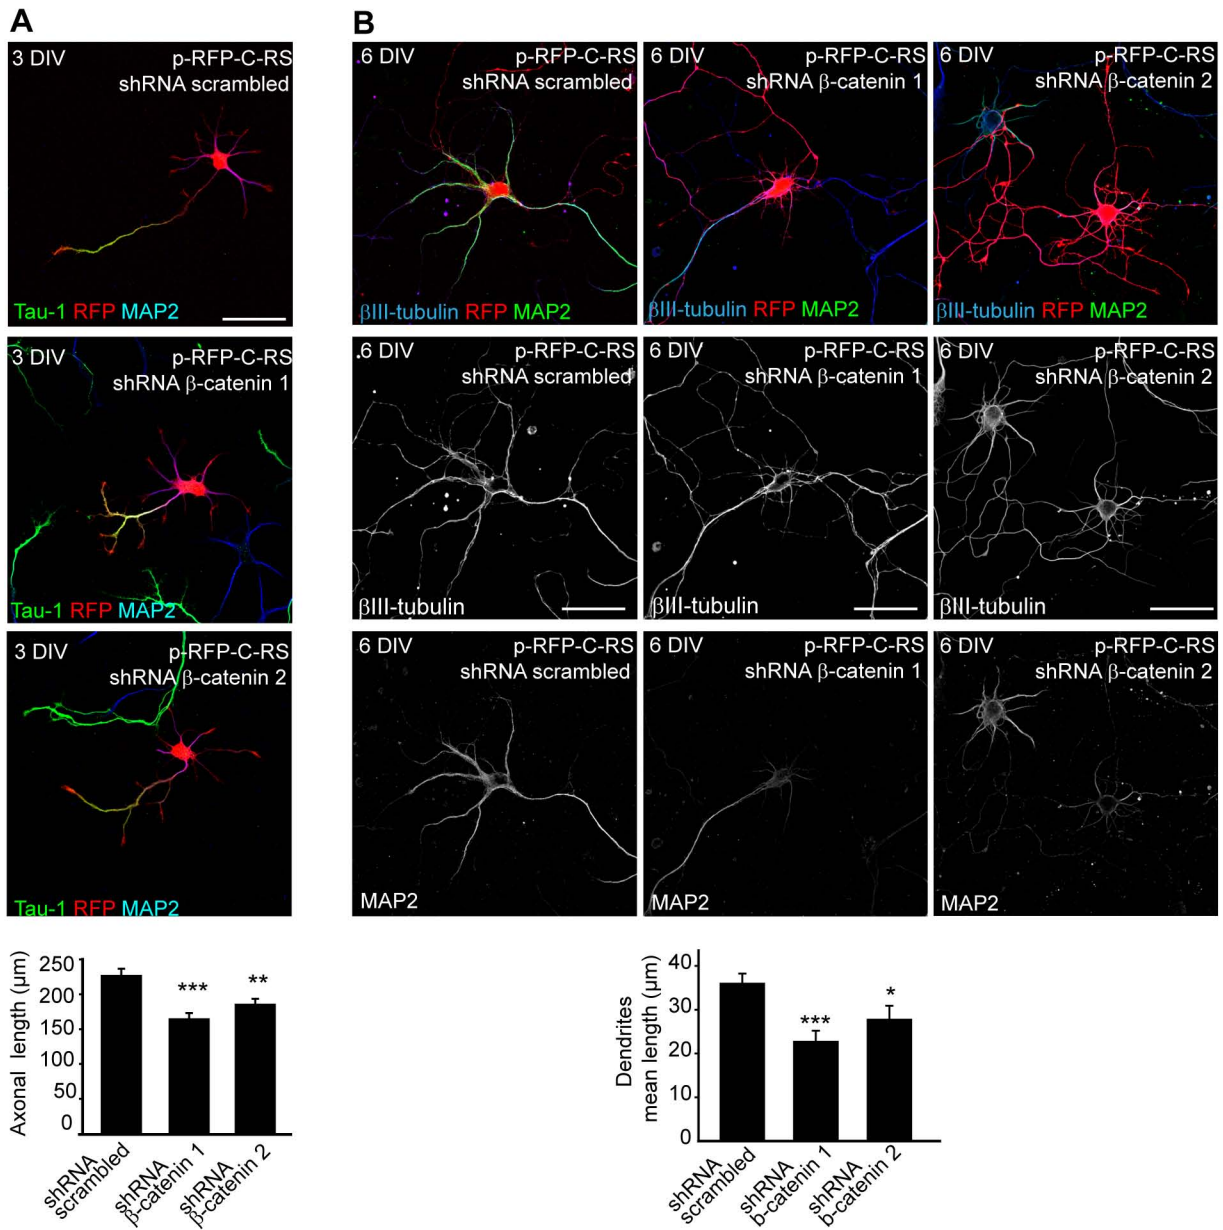

Supplementary figure 8  
CMLS-D-12-00047R1
